# Supplementary material for: Phylogenetic Analysis and Genetic Structure of Schlegel’s Japanese Gecko (Gekko japonicus) from China Based on Mitochondrial DNA Sequences
Source: MDPI journal article supplement (doi:10.3390/genes14010018), 2022-12-21
Supplement: s1 [file s1]

**Table S1 325 Sample information of *G. japonicus* used in experiments in this study**

| Number of samples | Sampling site      | Specimen number                           | Latitude and longitude |
|-------------------|--------------------|-------------------------------------------|------------------------|
| 12                | Anqing, Anhui      | AHAQ01-12                                 | 30.52°N, 117.04°E      |
| 1                 | Lu'an, Anhui       | AHLA01-20                                 | 32.56°N, 116.81°E      |
| 12                | Wuhu, Anhui        | AHWH01-05, AHWH07-10, AHWH12, AHWH14-15   | 31.34°N, 118.39°E      |
| 1                 | Nanping, Fujian    | FJNP29                                    | 26.65°N, 118.18°E      |
| 3                 | Yong'an, Fujian    | FJYA24-26                                 | 25.94°N, 117.36°E      |
| 2                 | Guiding, Guangzhou | GZGD01-02                                 | 26.34°N, 107.13°E      |
| 19                | Guilin, Guangxi    | GXGL1-19                                  | 25.16°N, 110.16°E      |
| 14                | Longsheng, Guangxi | GXLS01-14                                 | 25.47°N, 110.01°E      |
| 5                 | Yongfu, Guangxi    | GXYF01-05                                 | 24.59°N, 109.59°E      |
| 2                 | Yangshuo, Guangxi  | GXYS01-02                                 | 24.78°N, 110.50°E      |
| 1                 | Huaxi, Guizhou     | GZHX01                                    | 26.26°N, 106.40°E      |
| 3                 | Libo, Guizhou      | GZLB01-03                                 | 25.42°N, 107.88°E      |
| 2                 | Longli, Guizhou    | GZLL01-02                                 | 26.46°N, 106.99°E      |
| 1                 | Jingmen, Hubei     | HBJM05                                    | 31.03°N, 112.20°E      |
| 13                | Wuhan, Hubei       | HBWH01-13                                 | 30.32°N, 114.21°E      |
| 13                | Chengbu, Hunan     | HNCB01-03, HNCB05-10, HHNCB12-15, HNCB17, | 26.37°N, 110.30°E      |
| 8                 | Changde, Hunan     | HNCD01-02, HNCD04-09                      | 29.04°N, 111.69°E      |
| 19                | Daoxian, Hunan     | HNDX04-13, HNDX16-19, HNDX21-25           | 25.52°N, 111.57°E      |
| 15                | Huaihua, Hunan     | HNHH01, HNHH03, HNHH05, HNHH07-18         | 27.52°N, 109.95°E      |
| 16                | Huitong, Human     | HNHT01, HNHT03-17                         | 26.86 °N, 109.71 °E    |
| 16                | Huayuan, Hunan     | HNHY01-05, HNHY07-15, HNHY18, HNHY19      | 28.35°N, 109.28°E      |
| 4                 | Shuangpai, Hunan   | HNSP01-02, HNSP04-6, HNSP10-15            | 25.96°N, 111.63°E      |
| 5                 | Shaoyang, Hunan    | HNSY01-05                                 | 27.14°N, 111.28°E      |
| 6                 | Tongdao, Hunan     | HNTD01, HNTD03, HNTD05-08                 | 26.16°N, 109.77°E      |
| 20                | Xinhuang, Hunan    | HNXH01-20                                 | 27.21°N, 109.18°E      |
| 12                | Yueyang, Hunan     | HNYY01-12                                 | 29.24°N, 113.08°E      |
| 12                | Yongzhou, Hunan    | HNYZ01-07, HNYZ09-10, HNYZ13-15           | 26.27°N, 111.35°E      |
| 4                 | Xinning, Hunan     | HNXN01, HNXN03-04, HNXN06-08, HNXN12      | 26.44°N, 110.84°E      |

|    |                      |                                      |                                                                  |                   |
|----|----------------------|--------------------------------------|------------------------------------------------------------------|-------------------|
| 12 | Lingshutan,<br>Hunan | Yongzhou,                            | YZLST1-12                                                        | 26.22°N, 111.63°E |
| 5  | Hunan                | Yongzhou Qingtang<br>Yueyan Forestry | QTY01, QTY02,<br>QTY04-06                                        | 25.49°N, 111.39°E |
| 7  | Zhuzhou, Hunan       |                                      | HNZZ01-02, HNZZ04-08                                             | 27.50°N, 113.09°E |
| 2  | Rugao, Jiangsu       |                                      | JSRG03, JSRG04                                                   | 32.38°N, 120.58°E |
| 24 | Longnan, Jiangxi     |                                      | JXLN01-24                                                        | 24.54°N, 114.51°E |
| 15 | Yangxian, Shaanxi    |                                      | SXYX04, SXYX09-11,<br>SXYX13-17, SXYX19,<br>SXYX21-22, SXYX25-27 | 33.23°N, 107.55°E |
| 8  | Hangzhou, Zhejiang   |                                      | ZJHZ01, ZJHZ06,<br>ZJHZ08-10, ZJHZ15-17                          | 30.25°N, 120.20°E |
| 11 | Zhoushan, Zhejiang   |                                      | ZJZS01-09, ZJZS11-12                                             | 29.96°N, 122.31°E |
| 1  | Lishui, Zhejiang     |                                      | ZJLS15                                                           | 28.45°N, 119.92°E |
