# Supplementary material for: Phylogenetic Analysis and Genetic Structure of Schlegel’s Japanese Gecko (Gekko japonicus) from China Based on Mitochondrial DNA Sequences
Source: MDPI journal article supplement (doi:10.3390/genes14010018), 2022-12-21
Supplement: s1 [file s1]

**Table S3 Sample information included in each haplotype of the *G. japonicus* *COI* gene**

| Haplotype     | Sample | Specimen information                                                                                                                                                                                                                                                                                                                                                                                                                                                                                                                                                                                                                                                                                                                                                                                                                                                                                                                                                                                                                                                                                                                                                                                                                                                                                                                                                                                                                                                                                                                                                                                                           |
|---------------|--------|--------------------------------------------------------------------------------------------------------------------------------------------------------------------------------------------------------------------------------------------------------------------------------------------------------------------------------------------------------------------------------------------------------------------------------------------------------------------------------------------------------------------------------------------------------------------------------------------------------------------------------------------------------------------------------------------------------------------------------------------------------------------------------------------------------------------------------------------------------------------------------------------------------------------------------------------------------------------------------------------------------------------------------------------------------------------------------------------------------------------------------------------------------------------------------------------------------------------------------------------------------------------------------------------------------------------------------------------------------------------------------------------------------------------------------------------------------------------------------------------------------------------------------------------------------------------------------------------------------------------------------|
| Serial Number | size   |                                                                                                                                                                                                                                                                                                                                                                                                                                                                                                                                                                                                                                                                                                                                                                                                                                                                                                                                                                                                                                                                                                                                                                                                                                                                                                                                                                                                                                                                                                                                                                                                                                |
| H1            | 233    | AHAQ01 AHAQ02 AHAQ03 AHAQ04 AHAQ05 AHAQ08 AHAQ10<br>AHAQ12 AHLA07 AHW01 AHW02 AHW03 AHW04<br>AHW05 AHW07 AHW08 AHW09 AHW10 AHW12<br>AHW15 FJNP29 FJYA25 GXGL01 GXGL02 GXGL03 GXGL04<br>GXGL05 GXGL06 GXGL07 GXGL08 GXGL10 GXGL11 GXGL12<br>GXGL13 GXGL14 GXGL15 GXGL16 GXGL17 GXGL18 GXGL19<br>GXLS02 GXLS03 GXLS04 GXLS05 GXLS06 GXLS08 GXLS09<br>GXLS10 GXLS11 GXLS12 GXLS13 GXLS14 GXYF04 GXY01<br>GZGD01 GZGD02 GZHX01 GZLB01 GZLB02 GZLB03 GZLL01<br>GZLL02 HBJM05 HBWH01 HBWH02 HBWH04 HBWH05 HBWH06<br>HBWH07 HBWH09 HBWH11 HNCB01 HNCB02 HNCB03 HNCB05<br>HNCB06 HNCB07 HNCB09 HNCB10 HNCB12 HNCB13 HNCB14<br>HNCB15 HNCB17 HNC01 HNC04 HNC05 HNC06 HNC07<br>HNC08 HNC09 HNDX04 HNDX05 HNDX08 HNDX09 HNDX10<br>HNDX11 HNDX17 HNDX18 HNDX19 HNDX23 HNDX25 HNHH05<br>HNHH07 HNHT03 HNHT06 HNHT10 HNHT11 HNHT17 HNHY01<br>HNHY03 HNHY04 HNHY05 HNHY07 HNHY08 HNHY09 HNHY10<br>HNHY11 HNHY12 HNHY13 HNHY14 HNHY15 HNHY18 HN06<br>HN012 HNSY01 HNSY02 HNSY03 HNSY04 HNTD01 HNTD03<br>HNTD05 HNTD06 HNTD08 HNXH02 HNXH04 HNXH05 HNXH06<br>HNXH11 HNXH12 HNXH15 HNXH16 HNXH17 HNXH19 HNXH20<br>HNXN01 HNXN04 HNXN07 HNXN08 HNY01 HNY02 HNY03<br>HNY04 HNY05 HNY06 HNY07 HNY08 HNY09 HNY10<br>HNY11 HNY12 HNYZ02 HNYZ04 HNYZ05 HNYZ07 HNYZ09<br>HNYZ13 HNYZ14 HNZZ01 HNZZ02 HNZZ05 HNZZ06 HNZZ08<br>JSRG03 JSRG04 JXLN01 JXLN02 JXLN03 JXLN04 JXLN05 JXLN06<br>JXLN07 JXLN08 JXLN09 JXLN10 JXLN11 JXLN12 JXLN14<br>JXLN15 JXLN16 JXLN17 JXLN18 JXLN20 JXLN21 JXLN22<br>JXLN23 JXLN24 QTY01 QTY04 QTY05 QTY06 SXYX04<br>SXYX09 SXYX10 SXYX11 SXYX13 SXYX25 SXYX26 SXYX27<br>YZLST09 YZLST1 YZLST10 YZLST12 YZLST2 YZLST3 YZLST5 |

---

|     |    |                                                                                                                                                                                                                                                                                                                                                                                                                       |
|-----|----|-----------------------------------------------------------------------------------------------------------------------------------------------------------------------------------------------------------------------------------------------------------------------------------------------------------------------------------------------------------------------------------------------------------------------|
|     |    | YZLST6 YZLST7 YZLST8 ZJHZ06 ZJHZ08 ZJHZ09 ZJHZ10 ZJHZ15<br>ZJHZ17 ZJLS15 ZJZS01 ZJZS02 ZJZS03 ZJZS04 ZJZS07 ZJZS08<br>ZJZS09                                                                                                                                                                                                                                                                                          |
| H2  | 1  | AHAQ07                                                                                                                                                                                                                                                                                                                                                                                                                |
| H3  | 2  | AHAQ09 AHAQ11                                                                                                                                                                                                                                                                                                                                                                                                         |
| H4  | 11 | AHWH14 HBWH03 HBWH10 HBWH12 HNTD07 HNYZ15<br>YZLST11 YZLST4 ZJZS05 ZJZS11 ZJZS12                                                                                                                                                                                                                                                                                                                                      |
| H5  | 55 | FJYA24 FJYA26 GXGL09 GXYF01 GXYF02 GXYF03 GXYF05<br>HBWH08 HBWH13 HNDX06 HNDX07 HNDX12 HNDX13 HNDX16<br>HNDX21 HNDX22 HNHH01 HNHH03 HNHH08 HNHH09 HNHH10<br>HNHH11 HNHH12 HNHH13 HNHH14 HNHH15 HNHH16 HNHH17<br>HNHH18 HNHY02 HNHY19 HNXP14 HNXH01 HNXH03 HNXH07<br>HNXH08 HNXH09 HNXH10 HNXH13 HNXH14 HNXH18 HNYZ01<br>HNYZ03 HNYZ06 HNYZ10 HNZZ07 QTYX02 SXYX14 SXYX15<br>SXYX16 SXYX17 SXYX19 SXYX21 SXYX22 ZJHZ16 |
| H6  | 4  | GXLS01 GXLS07 HNDX24 HNZZ04                                                                                                                                                                                                                                                                                                                                                                                           |
| H7  | 1  | HNCD02                                                                                                                                                                                                                                                                                                                                                                                                                |
| H8  | 10 | HNHT01 HNHT04 HNHT05 HNHT07 HNHT09 HNHT12 HNHT13<br>HNHT14 HNHT15 HNHT16                                                                                                                                                                                                                                                                                                                                              |
| H9  | 1  | HNHT08                                                                                                                                                                                                                                                                                                                                                                                                                |
| H10 | 1  | HNSP13                                                                                                                                                                                                                                                                                                                                                                                                                |
| H11 | 1  | HNSY05                                                                                                                                                                                                                                                                                                                                                                                                                |
| H12 | 2  | JXLN13 JXLN19                                                                                                                                                                                                                                                                                                                                                                                                         |
| H13 | 1  | ZJHZ01                                                                                                                                                                                                                                                                                                                                                                                                                |
| H14 | 1  | ZJZS06                                                                                                                                                                                                                                                                                                                                                                                                                |

---
