# Supplementary material for: Phylogenetic Analysis and Genetic Structure of Schlegel’s Japanese Gecko (Gekko japonicus) from China Based on Mitochondrial DNA Sequences
Source: MDPI journal article supplement (doi:10.3390/genes14010018), 2022-12-21
Supplement: s1 [file s1]

**Table S2 Species sources and accession numbers of *COI* gene in *Gekko* downloaded from GenBank**

| <b>Species</b>                                  | <b>GenBank accession numbers</b>                              |
|-------------------------------------------------|---------------------------------------------------------------|
| <i>G. auriverrucosus</i>                        | EU417716; EU417717; EU417718; EU417719                        |
| <i>G. chinensis</i>                             | HM802951; HM802952; HM802953; HM802954                        |
| <i>G. gecko</i>                                 | JF920685; JF920686; JF920687; JF920688                        |
| <i>G. hokouensis</i>                            | EU417720; EU417721; EU417722                                  |
| <i>G. japonicus</i>                             | EU417723; EU417724; EU417725; EU417726; EU417727;<br>EU417728 |
| <i>G. kikuchii</i>                              | MH274041; MH274042                                            |
| <i>G. scabridus</i>                             | HM802946; HM802947; HM802948; HM802949;<br>HM802950           |
| <i>G. subpalmatus</i>                           | EU417713; EU417714; EU417715                                  |
| <i>G. swinhonis</i>                             | EU417709; EU417710; EU417711; EU417712; HM802938;             |
| <i>G. wenxianensis</i>                          | EU417703; EU417704; EU417705; EU417706; EU417707;<br>EU417708 |
| <i>Hemidactylus dracaenacolus</i><br>(outgroup) | KU567362                                                      |
| <i>Hemidactylus granti</i><br>(outgroup)        | KU567372                                                      |
